# Supplementary material for: Evaluating the Real-World Safety Profile of Etrasimod in the Treatment of Ulcerative Colitis: A Comprehensive Analysis from FAERS Database
Source: Research Square preprint supplement (doi:10.21203/rs.3.rs-6187859/v1), 2025-03-31
Supplement: Supplementary file 1 [file 98c2c5c87d357b4adf394fe2.docx]

***Supplementary Material***

**Supplementary Tables**

**Supplementary Table 1:** All AEs meeting the positive signal threshold at the PT level from FAERS data

| **PT** | **Case Numbers** | **ROR (95% CI)** | **PRR (χ2)** | **EBGM (EBGM05)** | **IC (IC025)** |
| --- | --- | --- | --- | --- | --- |
| Drug ineffective | 110 | 3.91(3.22,4.75) | 3.68(219.44) | 3.68(3.03) | 1.88(1.56) |
| Type 2 diabetes mellitus | 81 | 108.17(86.41,135.41) | 101.99(8084.03) | 101.73(81.27) | 6.67(5.18) |
| Diabetic eye disease | 65 | 7232.24(5526.88,9463.81) | 6897.94(381415) | 5869.72(4485.64) | 12.52(5.64) |
| Condition aggravated | 46 | 7.27(5.42,9.75) | 7.07(240.61) | 7.06(5.27) | 2.82(2.22) |
| Headache | 43 | 3.07(2.26,4.16) | 3.00(58.10) | 3.00(2.22) | 1.59(1.08) |
| Dizziness | 32 | 2.86(2.01,4.06) | 2.81(37.75) | 2.81(1.98) | 1.49(0.91) |
| Fatigue | 30 | 1.73(1.20,2.48) | 1.71(8.97) | 1.71(1.19) | 0.77(0.22) |
| Diarrhoea | 26 | 1.82(1.24,2.69) | 1.81(9.49) | 1.81(1.23) | 0.85(0.25) |
| Malaise | 26 | 2.58(1.75,3.80) | 2.55(24.69) | 2.55(1.73) | 1.35(0.71) |
| Colitis ulcerative | 23 | 25.01(16.56,37.77) | 24.62(521.18) | 24.60(16.29) | 4.62(3.04) |
| Drug interaction | 21 | 5.86(3.81,9.02) | 5.79(83.42) | 5.79(3.76) | 2.53(1.63) |
| Haematochezia | 21 | 17.34(11.27,26.69) | 17.10(318.47) | 17.09(11.11) | 4.10(2.68) |
| Rectal haemorrhage | 16 | 16.24(9.92,26.58) | 16.06(226.06) | 16.06(9.81) | 4.01(2.39) |
| Therapeutic product effect incomplete | 15 | 6.23(3.74,10.36) | 6.17(65.08) | 6.17(3.71) | 2.63(1.49) |
| Colitis | 14 | 17.03(10.06,28.84) | 16.87(209.07) | 16.87(9.96) | 4.08(2.29) |
| Vision blurred | 14 | 4.57(2.70,7.74) | 4.54(38.68) | 4.54(2.68) | 2.18(1.13) |
| Nasopharyngitis | 12 | 2.93(1.66,5.17) | 2.91(15.11) | 2.91(1.65) | 1.54(0.54) |
| Hypersensitivity | 11 | 2.64(1.46,4.78) | 2.63(11.11) | 2.63(1.45) | 1.39(0.37) |
| Diabetic retinopathy | 10 | 129.62(69.52,241.69) | 128.71(1263.08) | 128.29(68.80) | 7.00(2.48) |
| Heart rate decreased | 10 | 12.27(6.58,22.85) | 12.19(102.70) | 12.18(6.54) | 3.61(1.72) |
| Bradycardia | 9 | 7.28(3.78,14.03) | 7.24(48.48) | 7.24(3.76) | 2.86(1.24) |
| Gastrointestinal disorder | 9 | 3.34(1.74,6.44) | 3.33(14.67) | 3.33(1.73) | 1.73(0.52) |
| Frequent bowel movements | 8 | 13.88(6.93,27.81) | 13.80(95.02) | 13.80(6.89) | 3.79(1.54) |
| Inflammation | 8 | 7.13(3.56,14.29) | 7.10(41.94) | 7.10(3.54) | 2.83(1.12) |
| Illness | 8 | 4.27(2.13,8.57) | 4.26(19.95) | 4.26(2.12) | 2.09(0.68) |
| Macular oedema | 7 | 56.20(26.73,118.17) | 55.93(377.10) | 55.85(26.56) | 5.80(1.81) |
| Defaecation urgency | 6 | 41.04(18.40,91.55) | 40.87(233.15) | 40.83(18.30) | 5.35(1.52) |
| Dyspepsia | 6 | 2.74(1.23,6.10) | 2.73(6.59) | 2.73(1.22) | 1.45(0.04) |
| Inflammatory bowel disease | 6 | 26.41(11.84,58.89) | 26.30(145.94) | 26.28(11.78) | 4.72(1.42) |
| Blood cholesterol abnormal | 5 | 47.33(19.66,113.94) | 47.16(225.67) | 47.11(19.57) | 5.56(1.26) |
| Blood pressure abnormal | 5 | 11.44(4.75,27.53) | 11.40(47.45) | 11.40(4.74) | 3.51(0.88) |
| Eye disorder | 5 | 6.79(2.82,16.34) | 6.77(24.59) | 6.77(2.81) | 2.76(0.61) |
| Thyroid disorder | 5 | 14.38(5.98,34.61) | 14.33(62.01) | 14.33(5.95) | 3.84(0.97) |
| Lymphocyte count decreased | 4 | 9.82(3.68,26.20) | 9.79(31.58) | 9.79(3.67) | 3.29(0.53) |
| Drug ineffective for unapproved indication | 4 | 81.57(30.54,217.88) | 81.35(316.79) | 81.18(30.39) | 6.34(0.96) |
| Brain fog | 4 | 21.21(7.95,56.60) | 21.15(76.76) | 21.14(7.92) | 4.40(0.78) |
| Diarrhoea haemorrhagic | 3 | 13.99(4.50,43.43) | 13.96(36.08) | 13.95(4.49) | 3.80(0.27) |
| Gout | 3 | 7.35(2.37,22.83) | 7.34(16.43) | 7.34(2.36) | 2.88(0.06) |
| Herpes simplex | 3 | 20.58(6.63,63.92) | 20.54(55.75) | 20.53(6.61) | 4.36(0.36) |
| Iron deficiency anaemia | 3 | 14.56(4.69,45.20) | 14.53(37.78) | 14.52(4.68) | 3.86(0.28) |
| Mucous stools | 3 | 28.69(9.24,89.11) | 28.63(79.95) | 28.61(9.21) | 4.84(0.41) |
| Proctitis ulcerative | 3 | 233.92(75.10,728.62) | 233.43(690.21) | 232.06(74.50) | 7.86(0.53) |
| Large intestine polyp | 3 | 14.63(4.71,45.42) | 14.60(38.00) | 14.59(4.70) | 3.87(0.29) |
| Escherichia infection | 3 | 16.67(5.37,51.76) | 16.64(44.07) | 16.63(5.36) | 4.06(0.32) |
| Poor quality sleep | 3 | 6.24(2.01,19.39) | 6.23(13.18) | 6.23(2.01) | 2.64(-0.01) |
| Liver function test increased | 3 | 6.67(2.15,20.70) | 6.66(14.42) | 6.65(2.14) | 2.73(0.02) |
| Drug effect less than expected | 3 | 13.21(4.25,41.01) | 13.18(33.76) | 13.18(4.24) | 3.72(0.26) |

Abbreviation: ROR, reporting odds ratio; PRR, proportional reporting ratio; EBGM, empirical Bayesian geometric mean; EBGM05, the lower limit of the 95% CI of EBGM; IC, information component; IC025, the lower limit of the 95% CI of the IC; CI, confidence interval; PT,preferred term; AE, adverse events.

**Supplementary Table 2:** Top 50 most frequent AEs for etrasimod at the PT level in females from FAERS database

| **PT** | **Case Numbers** | **ROR (95% CI)** | **PRR (χ2)** | **EBGM (EBGM05)** | **IC (IC025)** |
| --- | --- | --- | --- | --- | --- |
| Drug ineffective* | 38 | 2.71(1.95,3.76) | 2.62(38.77) | 2.62(1.89) | 1.39(0.85) |
| Type 2 diabetes mellitus* | 37 | 94.56(67.89,131.69) | 89.67(3239.63) | 89.49(64.26) | 6.48(4.27) |
| Nausea* | 20 | 1.90(1.22,2.97) | 1.88(8.30) | 1.88(1.20) | 0.91(0.21) |
| Diarrhoea | 12 | 1.60(0.90,2.82) | 1.59(2.63) | 1.59(0.90) | 0.67(-0.21) |
| Rectal haemorrhage* | 10 | 22.58(12.09,42.16) | 22.28(203.25) | 22.27(11.93) | 4.48(2.05) |
| Hypersensitivity* | 9 | 3.72(1.93,7.18) | 3.69(17.69) | 3.69(1.91) | 1.88(0.62) |
| Colitis ulcerative* | 8 | 19.49(9.71,39.14) | 19.28(138.71) | 19.28(9.60) | 4.27(1.70) |
| Colitis* | 7 | 18.03(8.56,37.97) | 17.87(111.46) | 17.86(8.48) | 4.16(1.50) |
| Haematochezia* | 7 | 13.00(6.17,27.38) | 12.88(76.76) | 12.88(6.12) | 3.69(1.35) |
| Therapeutic product effect incomplete* | 7 | 6.01(2.86,12.66) | 5.96(28.95) | 5.96(2.83) | 2.58(0.85) |
| Constipation* | 7 | 2.93(1.39,6.17) | 2.91(8.80) | 2.91(1.38) | 1.54(0.20) |
| Abdominal pain | 6 | 2.08(0.93,4.64) | 2.07(3.32) | 2.07(0.93) | 1.05(-0.25) |
| Rash | 6 | 1.13(0.50,2.51) | 1.12(0.08) | 1.12(0.50) | 0.17(-0.95) |
| Diabetic retinopathy* | 5 | 137.42(56.94,331.65) | 136.46(670.30) | 136.04(56.37) | 7.09(1.35) |
| Drug hypersensitivity | 5 | 1.86(0.77,4.48) | 1.85(1.97) | 1.85(0.77) | 0.89(-0.49) |
| Blood cholesterol abnormal* | 4 | 73.41(27.45,196.31) | 73.01(283.63) | 72.89(27.26) | 6.19(0.95) |
| Frequent bowel movements* | 4 | 14.02(5.24,37.45) | 13.94(48.06) | 13.94(5.22) | 3.80(0.66) |
| Haemorrhage* | 4 | 4.30(1.61,11.49) | 4.28(10.07) | 4.28(1.60) | 2.10(0.07) |
| Vomiting | 4 | 0.67(0.25,1.78) | 0.67(0.67) | 0.67(0.25) | -0.58(-1.78) |
| Hypertension | 4 | 1.63(0.61,4.36) | 1.63(0.97) | 1.63(0.61) | 0.70(-0.76) |
| Defaecation urgency* | 3 | 43.34(13.94,134.77) | 43.16(123.44) | 43.12(13.87) | 5.43(0.46) |
| Inflammatory bowel disease* | 3 | 34.70(11.16,107.89) | 34.55(97.69) | 34.53(11.10) | 5.11(0.43) |
| Product prescribing error* | 3 | 6.90(2.22,21.43) | 6.87(15.06) | 6.87(2.21) | 2.78(0.03) |
| Dyspepsia | 3 | 2.41(0.77,7.48) | 2.40(2.45) | 2.40(0.77) | 1.26(-0.62) |
| Blood pressure increased | 3 | 1.65(0.53,5.13) | 1.65(0.77) | 1.65(0.53) | 0.72(-0.94) |
| COVID-19 | 3 | 1.44(0.46,4.49) | 1.44(0.41) | 1.44(0.46) | 0.53(-1.07) |
| Abdominal pain upper | 3 | 1.12(0.36,3.47) | 1.12(0.04) | 1.12(0.36) | 0.16(-1.33) |
| Drug effect less than expected | 2 | 23.66(5.90,94.81) | 23.59(43.25) | 23.58(5.88) | 4.56(-0.20) |
| Therapeutic product effect delayed | 2 | 21.29(5.31,85.34) | 21.24(38.55) | 21.23(5.30) | 4.41(-0.22) |
| Flatulence | 2 | 3.00(0.75,12.03) | 3.00(2.66) | 3.00(0.75) | 1.58(-0.82) |
| Blood glucose increased | 2 | 0.93(0.23,3.71) | 0.93(0.01) | 0.93(0.23) | -0.11(-1.74) |
| Crohn's disease | 2 | 2.77(0.69,11.10) | 2.77(2.26) | 2.77(0.69) | 1.47(-0.87) |
| Drug ineffective for unapproved indication | 2 | 3.55(0.89,14.22) | 3.54(3.65) | 3.54(0.88) | 1.82(-0.73) |
| Lymphocyte count decreased | 2 | 9.52(2.38,38.13) | 9.49(15.20) | 9.49(2.37) | 3.25(-0.36) |
| Liver function test increased | 2 | 8.80(2.20,35.27) | 8.78(13.79) | 8.78(2.19) | 3.13(-0.38) |
| Aspartate aminotransferase increased | 2 | 3.64(0.91,14.60) | 3.64(3.82) | 3.64(0.91) | 1.86(-0.72) |
| Drug ineffective for unapproved indication | 2 | 3.55(0.89,14.22) | 3.54(3.65) | 3.54(0.88) | 1.82(-0.73) |
| Alanine aminotransferase increased | 2 | 3.21(0.80,12.88) | 3.21(3.04) | 3.21(0.80) | 1.68(-0.78) |
| Flatulence | 2 | 3.00(0.75,12.03) | 3.00(2.66) | 3.00(0.75) | 1.58(-0.82) |
| Crohn's disease | 2 | 2.77(0.69,11.10) | 2.77(2.26) | 2.77(0.69) | 1.47(-0.87) |
| Intentional product misuse | 2 | 1.53(0.38,6.12) | 1.53(0.36) | 1.53(0.38) | 0.61(-1.29) |
| White blood cell count decreased | 2 | 1.50(0.37,6.02) | 1.50(0.33) | 1.50(0.37) | 0.59(-1.31) |
| Blood glucose increased | 2 | 0.93(0.23,3.71) | 0.93(0.01) | 0.93(0.23) | -0.11(-1.74) |
| Electrocardiogram PR shortened | 1 | 336.52(46.98,2410.31) | 336.05(331.52) | 333.51(46.56) | 8.38(-1.06) |
| Gingival hypertrophy | 1 | 55.59(7.81,395.69) | 55.51(53.47) | 55.45(7.79) | 5.79(-1.07) |
| Contrast media allergy | 1 | 52.17(7.33,371.31) | 52.10(50.06) | 52.04(7.31) | 5.70(-1.07) |
| Noninfective gingivitis | 1 | 45.87(6.45,326.45) | 45.81(43.79) | 45.76(6.43) | 5.52(-1.08) |
| Large intestinal haemorrhage | 1 | 41.98(5.90,298.75) | 41.93(39.91) | 41.89(5.89) | 5.39(-1.08) |
| Gingival recession | 1 | 38.87(5.46,276.60) | 38.82(36.82) | 38.79(5.45) | 5.28(-1.08) |
| Polycystic ovaries | 1 | 34.60(4.86,246.18) | 34.55(32.56) | 34.53(4.85) | 5.11(-1.09) |

Abbreviation: Asterisks (*) indicate statistically significant signals in algorithm; ROR, reporting odds ratio; PRR, proportional reporting ratio; EBGM, empirical Bayesian geometric mean; EBGM05, the lower limit of the 95% CI of EBGM; IC, information component; IC025, the lower limit of the 95% CI of the IC; CI, confidence interval; PT,preferred term; AEs, adverse events.

**Supplementary Table 3:** Top 50 most frequent AEs for etrasimod at the PT level in males from FAERS database

| **PT** | **Case Numbers** | **ROR (95% CI)** | **PRR (χ2)** | **EBGM (EBGM05)** | **IC (IC025)** |
| --- | --- | --- | --- | --- | --- |
| Drug ineffective* | 49 | 4.66(3.48,6.25) | 4.35(128.82) | 4.35(3.24) | 2.12(1.60) |
| Type 2 diabetes mellitus* | 44 | 198.16(145.59,269.72) | 183.02(7924.25) | 182.01(133.72) | 7.51(4.73) |
| Drug ineffective* | 23 | 7.04(4.48,11.08) | 5.92(97.15) | 5.92(3.77) | 2.57(1.64) |
| Colitis ulcerative* | 15 | 32.11(19.23,53.64) | 31.30(439.93) | 31.27(18.72) | 4.97(2.70) |
| Haematochezia* | 14 | 22.77(13.40,38.71) | 22.24(284.11) | 22.23(13.08) | 4.47(2.45) |
| Diarrhoea* | 12 | 2.13(1.20,3.77) | 2.10(7.01) | 2.10(1.19) | 1.07(0.14) |
| Colitis* | 7 | 19.35(9.18,40.78) | 19.12(120.23) | 19.11(9.07) | 4.26(1.52) |
| Therapeutic product effect incomplete* | 7 | 7.58(3.60,15.97) | 7.50(39.48) | 7.50(3.56) | 2.91(1.02) |
| Rectal haemorrhage* | 6 | 12.05(5.39,26.94) | 11.94(60.15) | 11.93(5.34) | 3.58(1.12) |
| Rash | 6 | 1.52(0.68,3.39) | 1.51(1.05) | 1.51(0.68) | 0.60(-0.60) |
| Diabetic retinopathy* | 5 | 128.50(53.19,310.45) | 127.39(624.61) | 126.90(52.53) | 6.99(1.34) |
| Abdominal pain upper* | 5 | 3.27(1.36,7.90) | 3.25(7.83) | 3.25(1.35) | 1.70(0.06) |
| Loss of therapeutic response* | 4 | 472.25(173.51,1285.34) | 457.05(1801.31) | 452.28(166.17) | 8.82(0.98) |
| Frequent bowel movements* | 4 | 15.46(5.78,41.35) | 15.36(53.70) | 15.35(5.74) | 3.94(0.69) |
| Macular oedema* | 3 | 227.95(72.29,718.77) | 222.46(658.08) | 221.33(70.19) | 7.79(0.51) |
| Macular oedema* | 3 | 52.69(16.93,164.02) | 52.42(151.10) | 52.34(16.82) | 5.71(0.47) |
| Defaecation urgency* | 3 | 46.06(14.80,143.36) | 45.82(131.37) | 45.76(14.70) | 5.52(0.46) |
| Inflammatory bowel disease* | 3 | 23.45(7.54,72.95) | 23.33(64.09) | 23.32(7.49) | 4.54(0.38) |
| Gout* | 3 | 10.80(3.47,33.60) | 10.75(26.53) | 10.75(3.45) | 3.43(0.20) |
| Vertigo* | 3 | 6.95(2.23,21.61) | 6.92(15.19) | 6.92(2.22) | 2.79(0.03) |
| Gastrooesophageal reflux disease* | 3 | 4.95(1.59,15.39) | 4.93(9.40) | 4.93(1.58) | 2.30(-0.13) |
| Hypertension | 3 | 1.51(0.48,4.68) | 1.50(0.51) | 1.50(0.48) | 0.59(-1.03) |
| Nausea | 3 | 0.55(0.18,1.72) | 0.55(1.08) | 0.55(0.18) | -0.85(-2.13) |
| Proctitis ulcerative | 2 | 335.50(83.12,1354.28) | 334.34(657.97) | 330.97(81.99) | 8.37(-0.11) |
| Maculopathy | 2 | 97.27(24.22,390.69) | 96.94(189.34) | 96.65(24.06) | 6.59(-0.12) |
| Hepatic cyst | 2 | 69.58(17.33,279.31) | 69.34(134.44) | 69.20(17.24) | 6.11(-0.13) |
| Large intestine polyp | 2 | 20.79(5.18,83.35) | 20.72(37.51) | 20.71(5.16) | 4.37(-0.22) |
| Arrhythmia | 2 | 20.08(4.96,81.24) | 19.77(35.66) | 19.77(4.89) | 4.30(-0.24) |
| Glaucoma | 2 | 12.75(3.18,51.12) | 12.71(21.57) | 12.70(3.17) | 3.67(-0.30) |
| Lymphocyte count decreased | 2 | 12.18(3.04,48.85) | 12.14(20.45) | 12.14(3.03) | 3.60(-0.31) |
| Taste disorder | 2 | 12.05(3.01,48.32) | 12.01(20.19) | 12.01(3.00) | 3.59(-0.31) |
| Clostridium difficile infection | 2 | 10.44(2.60,41.87) | 10.41(17.01) | 10.41(2.60) | 3.38(-0.34) |
| Gastritis | 2 | 8.69(2.17,34.82) | 8.66(13.55) | 8.66(2.16) | 3.11(-0.39) |
| Arthritis | 2 | 3.66(0.91,14.68) | 3.65(3.86) | 3.65(0.91) | 1.87(-0.72) |
| Hepatic enzyme increased | 2 | 3.63(0.91,14.56) | 3.62(3.80) | 3.62(0.90) | 1.86(-0.72) |
| Crohn's disease | 2 | 3.08(0.77,12.36) | 3.08(2.80) | 3.08(0.77) | 1.62(-0.81) |
| Dyspepsia | 2 | 2.63(0.66,10.55) | 2.63(2.02) | 2.63(0.66) | 1.39(-0.90) |
| Vomiting | 2 | 2.56(0.63,10.35) | 2.53(1.87) | 2.53(0.63) | 1.34(-0.95) |
| Diabetes mellitus | 2 | 2.28(0.57,9.14) | 2.28(1.43) | 2.28(0.57) | 1.19(-1.00) |
| Therapeutic product effect decreased | 2 | 2.23(0.56,8.93) | 2.22(1.35) | 2.22(0.55) | 1.15(-1.01) |
| Diarrhoea | 2 | 1.89(0.47,7.64) | 1.87(0.82) | 1.87(0.46) | 0.91(-1.15) |
| Drug hypersensitivity | 2 | 1.75(0.44,7.00) | 1.74(0.64) | 1.74(0.44) | 0.80(-1.19) |
| Hypersensitivity | 2 | 1.69(0.42,6.77) | 1.69(0.56) | 1.69(0.42) | 0.75(-1.22) |
| Peripheral swelling | 2 | 1.67(0.42,6.68) | 1.66(0.53) | 1.66(0.42) | 0.73(-1.23) |
| Blood glucose increased | 2 | 0.92(0.23,3.69) | 0.92(0.01) | 0.92(0.23) | -0.12(-1.75) |
| Cholangitis | 1 | 12.85(1.81,91.41) | 12.83(10.90) | 12.82(1.80) | 3.68(-1.15) |
| Cholelithiasis | 1 | 3.87(0.54,27.56) | 3.87(2.13) | 3.87(0.54) | 1.95(-1.38) |
| Metabolic dysfunction-associated steatohepatitis | 1 | 89.68(12.58,639.44) | 89.52(87.30) | 89.28(12.52) | 6.48(-1.07) |
| Haemangioma of liver | 1 | 118.92(16.66,848.70) | 118.71(116.30) | 118.29(16.57) | 6.89(-1.06) |
| Cholangitis sclerosing | 1 | 43.36(6.09,308.73) | 43.28(41.25) | 43.23(6.07) | 5.43(-1.08) |

Abbreviation: Asterisks (*) indicate statistically significant signals in algorithm; ROR, reporting odds ratio; PRR, proportional reporting ratio; EBGM, empirical Bayesian geometric mean; EBGM05, the lower limit of the 95% CI of EBGM; IC, information component; IC025, the lower limit of the 95% CI of the IC; CI, confidence interval; PT,preferred term; AEs, adverse events.

**Supplementary Table 4:** AEs at the PT level for etrasimod in patients aged ＜18 from FAERS database.

| **PT** | **Case Numbers** | **ROR (95% CI)** | **PRR (χ2)** | **EBGM (EBGM05)** | **IC (IC025)** |
| --- | --- | --- | --- | --- | --- |
| Colitis | 1 | 776.28(70.35,8566.53) | 517.86(515.80) | 517.47(46.89) | 9.02(-1.50) |
| Lymphocyte count decreased | 1 | 2113.11(191.29,23342.9) | 1409.08(1404.55) | 1406.21(127.30) | 10.46(-1.50) |

Abbreviation: ROR, reporting odds ratio; PRR, proportional reporting ratio; EBGM, empirical Bayesian geometric mean; EBGM05, the lower limit of the 95% CI of EBGM; IC, information component; IC025, the lower limit of the 95% CI of the IC; CI, confidence interval; PT, preferred term; AE, adverse event.

**Supplementary Table 5:** Top 50 most frequent AEs for etrasimod at the PT level in patients aged 18 to 44 from FAERS data

| **PT** | **Case Numbers** | **ROR (95% CI)** | **PRR (χ2)** | **EBGM (EBGM05)** | **IC (IC025)** |
| --- | --- | --- | --- | --- | --- |
| Type 2 diabetes mellitus* | 43 | 157.43(114.97,215.58) | 143.57(6039.86) | 142.36(103.96) | 7.15(4.62) |
| Drug ineffective* | 39 | 5.15(3.71,7.15) | 4.82(119.96) | 4.82(3.47) | 2.27(1.66) |
| Haematochezia* | 14 | 27.63(16.23,47.04) | 26.86(348.42) | 26.82(15.76) | 4.75(2.54) |
| Colitis ulcerative* | 11 | 17.92(9.85,32.58) | 17.53(171.52) | 17.51(9.63) | 4.13(2.04) |
| Diarrhoea* | 9 | 2.46(1.27,4.76) | 2.43(7.67) | 2.43(1.26) | 1.28(0.17) |
| Nausea | 8 | 1.13(0.56,2.28) | 1.13(0.12) | 1.13(0.56) | 0.18(-0.82) |
| Diabetic retinopathy* | 6 | 300.60(133.44,677.17) | 296.89(1738.76) | 291.76(129.51) | 8.19(1.67) |
| Rectal haemorrhage* | 5 | 16.78(6.95,40.51) | 16.61(73.35) | 16.60(6.87) | 4.05(1.02) |
| Therapeutic product effect incomplete* | 5 | 8.06(3.34,19.45) | 7.99(30.58) | 7.98(3.31) | 3.00(0.70) |
| Hypersensitivity* | 5 | 3.18(1.32,7.68) | 3.16(7.41) | 3.16(1.31) | 1.66(0.03) |
| Colitis* | 5 | 18.41(7.63,44.47) | 18.24(81.41) | 18.22(7.54) | 4.19(1.05) |
| Abdominal pain upper | 5 | 2.83(1.17,6.83) | 2.81(5.85) | 2.81(1.16) | 1.49(-0.08) |
| Abdominal pain | 4 | 1.44(0.54,3.86) | 1.44(0.54) | 1.44(0.54) | 0.52(-0.90) |
| Frequent bowel movements* | 4 | 14.80(5.53,39.60) | 14.68(50.99) | 14.67(5.48) | 3.87(0.68) |
| Inflammatory bowel disease* | 4 | 24.98(9.33,66.86) | 24.78(91.17) | 24.74(9.24) | 4.63(0.81) |
| Electrocardiogram QT prolonged | 2 | 5.18(1.29,20.77) | 5.16(6.71) | 5.16(1.29) | 2.37(-0.56) |
| Defaecation urgency | 2 | 32.14(8.01,129.07) | 32.01(59.99) | 31.96(7.96) | 5.00(-0.18) |
| Photophobia | 2 | 8.69(2.17,34.87) | 8.66(13.55) | 8.66(2.16) | 3.11(-0.39) |
| Dyspepsia | 2 | 2.83(0.70,11.33) | 2.82(2.35) | 2.82(0.70) | 1.49(-0.86) |
| Vomiting | 2 | 0.46(0.11,1.83) | 0.46(1.30) | 0.46(0.11) | -1.13(-2.51) |
| Constipation | 2 | 1.99(0.50,8.00) | 1.99(0.99) | 1.99(0.50) | 0.99(-1.09) |
| Defaecation urgency | 2 | 32.14(8.01,129.07) | 32.01(59.99) | 31.96(7.96) | 5.00(-0.18) |
| Arrhythmia | 2 | 6.94(1.73,27.84) | 6.92(10.12) | 6.91(1.72) | 2.79(-0.45) |
| Blood pressure increased | 2 | 2.53(0.63,10.13) | 2.52(1.84) | 2.52(0.63) | 1.33(-0.93) |
| Crohn's disease | 2 | 2.09(0.52,8.39) | 2.09(1.14) | 2.09(0.52) | 1.06(-1.06) |
| Clostridium difficile infection | 2 | 12.22(3.05,49.03) | 12.17(20.50) | 12.17(3.03) | 3.60(-0.31) |
| Electrocardiogram QT prolonged | 2 | 5.18(1.29,20.77) | 5.16(6.71) | 5.16(1.29) | 2.37(-0.56) |
| Alanine aminotransferase increased | 2 | 2.93(0.73,11.74) | 2.92(2.53) | 2.92(0.73) | 1.55(-0.84) |
| Liver function test increased | 2 | 13.97(3.48,56.07) | 13.92(23.97) | 13.91(3.47) | 3.80(-0.28) |
| Taste disorder | 2 | 23.86(5.94,95.76) | 23.76(43.56) | 23.73(5.91) | 4.57(-0.20) |
| Lymphocyte count decreased | 2 | 9.50(2.37,38.10) | 9.46(15.13) | 9.46(2.36) | 3.24(-0.36) |
| COVID-19 | 1 | 0.74(0.10,5.27) | 0.74(0.09) | 0.74(0.10) | -0.43(-2.28) |
| Drug hypersensitivity | 1 | 0.92(0.13,6.51) | 0.92(0.01) | 0.92(0.13) | -0.13(-2.11) |
| Contrast media allergy | 1 | 78.78(11.02,562.96) | 78.62(76.27) | 78.26(10.95) | 6.29(-1.07) |
| Multiple allergies | 1 | 22.93(3.22,163.37) | 22.89(20.91) | 22.86(3.21) | 4.51(-1.11) |
| Rash | 1 | 0.29(0.04,2.07) | 0.29(1.72) | 0.29(0.04) | -1.77(-3.19) |
| Diarrhoea haemorrhagic | 1 | 9.40(1.32,66.87) | 9.38(7.48) | 9.37(1.32) | 3.23(-1.19) |
| Electrocardiogram PR shortened | 1 | 306.52(42.33,2219.46) | 305.89(298.47) | 300.44(41.49) | 8.23(-1.08) |
| Cholangitis | 1 | 39.57(5.55,282.15) | 39.49(37.43) | 39.40(5.53) | 5.30(-1.09) |
| Hypertension | 1 | 0.82(0.12,5.85) | 0.82(0.04) | 0.82(0.12) | -0.28(-2.19) |
| Gout | 1 | 22.12(3.11,157.57) | 22.08(20.10) | 22.05(3.10) | 4.46(-1.11) |
| Arthritis enteropathic | 1 | 221.82(30.78,1598.37) | 221.37(216.52) | 218.50(30.32) | 7.77(-1.08) |
| Ankylosing spondylitis | 1 | 6.21(0.87,44.22) | 6.20(4.36) | 6.20(0.87) | 2.63(-1.26) |
| Clostridium difficile colitis | 1 | 15.44(2.17,109.91) | 15.41(13.46) | 15.39(2.16) | 3.94(-1.14) |
| Salivary hypersecretion | 1 | 8.27(1.16,58.89) | 8.26(6.38) | 8.26(1.16) | 3.05(-1.21) |
| Arthritis enteropathic | 1 | 221.82(30.78,1598.37) | 221.37(216.52) | 218.50(30.32) | 7.77(-1.08) |
| Ankylosing spondylitis | 1 | 6.21(0.87,44.22) | 6.20(4.36) | 6.20(0.87) | 2.63(-1.26) |
| Neoplasm malignant | 1 | 7.79(1.09,55.46) | 7.78(5.91) | 7.77(1.09) | 2.96(-1.22) |
| Cholangitis | 1 | 39.57(5.55,282.15) | 39.49(37.43) | 39.40(5.53) | 5.30(-1.09) |
| Vertigo | 1 | 1.71(0.24,12.17) | 1.71(0.29) | 1.71(0.24) | 0.77(-1.71) |

Abbreviation: Asterisks (*) indicate statistically significant signals in algorithm; ROR, reporting odds ratio; PRR, proportional reporting ratio; EBGM, empirical Bayesian geometric mean; EBGM05, the lower limit of the 95% CI of EBGM; IC, information component; IC025, the lower limit of the 95% CI of the IC; CI, confidence interval; PT, preferred term; AE, adverse event.

**Supplementary Table 6:** Top 50 most frequent AEs for etrasimod at the PT level in patients aged 45 to 64 from FAERS data

| **PT** | **Case Numbers** | **ROR (95% CI)** | **PRR (χ2)** | **EBGM (EBGM05)** | **IC (IC025)** |
| --- | --- | --- | --- | --- | --- |
| Type 2 diabetes mellitus* | 38 | 101.17(72.62,140.95) | 93.40(3464.49) | 93.08(66.81) | 6.54(4.31) |
| Drug ineffective* | 27 | 3.42(2.32,5.04) | 3.29(43.73) | 3.29(2.23) | 1.72(1.04) |
| Nausea | 9 | 1.25(0.65,2.42) | 1.25(0.44) | 1.25(0.64) | 0.32(-0.64) |
| Diarrhoea | 8 | 1.50(0.75,3.03) | 1.50(1.33) | 1.50(0.74) | 0.58(-0.47) |
| Colitis ulcerative* | 8 | 30.54(15.18,61.45) | 30.06(224.63) | 30.03(14.93) | 4.91(1.86) |
| Rectal haemorrhage* | 7 | 21.52(10.20,45.40) | 21.23(134.92) | 21.21(10.06) | 4.41(1.56) |
| Therapeutic product effect incomplete* | 7 | 8.57(4.06,18.07) | 8.46(46.10) | 8.46(4.01) | 3.08(1.10) |
| Hypersensitivity* | 6 | 4.51(2.02,10.09) | 4.47(16.20) | 4.47(2.00) | 2.16(0.48) |
| Constipation* | 6 | 3.91(1.75,8.76) | 3.88(12.86) | 3.88(1.73) | 1.96(0.36) |
| Blood glucose increased | 4 | 2.37(0.89,6.34) | 2.36(3.14) | 2.36(0.88) | 1.24(-0.41) |
| Haematochezia* | 4 | 9.99(3.73,26.72) | 9.91(32.06) | 9.91(3.70) | 3.31(0.53) |
| Rash | 4 | 1.14(0.43,3.05) | 1.14(0.07) | 1.14(0.43) | 0.19(-1.15) |
| Haemorrhage* | 4 | 7.08(2.65,18.95) | 7.03(20.72) | 7.03(2.63) | 2.81(0.37) |
| Colitis* | 4 | 12.88(4.81,34.46) | 12.78(43.44) | 12.77(4.77) | 3.68(0.63) |
| Hypertension | 4 | 2.09(0.78,5.59) | 2.08(2.26) | 2.08(0.78) | 1.06(-0.52) |
| Diabetic retinopathy* | 4 | 122.14(45.55,327.46) | 121.15(474.51) | 120.61(44.98) | 6.91(0.97) |
| Drug hypersensitivity | 3 | 1.86(0.60,5.79) | 1.85(1.18) | 1.85(0.60) | 0.89(-0.84) |
| Blood cholesterol abnormal* | 3 | 61.47(19.73,191.52) | 61.10(176.97) | 60.97(19.57) | 5.93(0.48) |
| Defaecation urgency* | 3 | 56.26(18.06,175.25) | 55.92(161.49) | 55.80(17.91) | 5.80(0.47) |
| COVID-19 | 2 | 1.21(0.30,4.86) | 1.21(0.07) | 1.21(0.30) | 0.28(-1.50) |
| Cerebrovascular accident | 2 | 1.53(0.38,6.15) | 1.53(0.37) | 1.53(0.38) | 0.62(-1.29) |
| Frequent bowel movements | 2 | 10.10(2.52,40.53) | 10.07(16.33) | 10.06(2.51) | 3.33(-0.35) |
| Dyspepsia | 2 | 2.22(0.55,8.88) | 2.21(1.33) | 2.21(0.55) | 1.14(-1.02) |
| Flatulence | 2 | 4.29(1.07,17.22) | 4.28(5.03) | 4.28(1.07) | 2.10(-0.64) |
| Frequent bowel movements | 2 | 10.10(2.52,40.53) | 10.07(16.33) | 10.06(2.51) | 3.33(-0.35) |
| Diabetes mellitus | 2 | 2.68(0.67,10.73) | 2.67(2.09) | 2.67(0.67) | 1.42(-0.89) |
| Gout | 2 | 14.06(3.50,56.39) | 14.00(24.15) | 14.00(3.49) | 3.81(-0.28) |
| Inflammatory bowel disease | 2 | 65.08(16.20,261.41) | 64.82(125.38) | 64.67(16.10) | 6.01(-0.13) |
| Therapeutic product effect delayed | 2 | 35.32(8.80,141.74) | 35.18(66.33) | 35.13(8.75) | 5.13(-0.17) |
| Cerebrovascular accident | 2 | 1.53(0.38,6.15) | 1.53(0.37) | 1.53(0.38) | 0.62(-1.29) |
| Macular oedema | 2 | 39.66(9.88,159.20) | 39.50(74.96) | 39.45(9.83) | 5.30(-0.16) |
| Maculopathy | 2 | 55.09(13.72,221.22) | 54.87(105.57) | 54.76(13.64) | 5.78(-0.14) |
| Peripheral swelling | 2 | 1.56(0.39,6.27) | 1.56(0.40) | 1.56(0.39) | 0.64(-1.28) |
| Cerebrovascular accident | 2 | 1.53(0.38,6.15) | 1.53(0.37) | 1.53(0.38) | 0.62(-1.29) |
| Rash erythematous | 1 | 2.62(0.37,18.66) | 2.62(1.00) | 2.62(0.37) | 1.39(-1.51) |
| Rash pruritic | 1 | 2.03(0.28,14.42) | 2.03(0.52) | 2.03(0.28) | 1.02(-1.62) |
| Eczema | 1 | 3.61(0.51,25.67) | 3.60(1.88) | 3.60(0.51) | 1.85(-1.40) |
| Lip swelling | 1 | 3.58(0.50,25.49) | 3.58(1.86) | 3.58(0.50) | 1.84(-1.40) |
| Haematuria | 1 | 4.00(0.56,28.43) | 3.99(2.24) | 3.99(0.56) | 2.00(-1.37) |
| Large intestinal haemorrhage | 1 | 70.68(9.91,504.07) | 70.54(68.37) | 70.35(9.86) | 6.14(-1.07) |
| Atrioventricular block first degree | 1 | 27.52(3.86,195.94) | 27.46(25.48) | 27.44(3.85) | 4.78(-1.10) |
| Cholelithiasis | 1 | 3.60(0.51,25.60) | 3.59(1.87) | 3.59(0.50) | 1.85(-1.40) |
| Abdominal pain upper | 1 | 0.57(0.08,4.09) | 0.58(0.31) | 0.58(0.08) | -0.80(-2.50) |
| Meningitis aseptic | 1 | 26.51(3.72,188.78) | 26.46(24.48) | 26.43(3.71) | 4.72(-1.10) |
| Gastrooesophageal reflux disease | 1 | 1.35(0.19,9.60) | 1.35(0.09) | 1.35(0.19) | 0.43(-1.85) |
| Gastritis | 1 | 3.99(0.56,28.37) | 3.98(2.23) | 3.98(0.56) | 1.99(-1.37) |
| Abdominal distension | 1 | 1.07(0.15,7.59) | 1.07(0.00) | 1.07(0.15) | 0.09(-2.00) |
| Faeces soft | 1 | 18.53(2.60,131.93) | 18.50(16.54) | 18.49(2.60) | 4.21(-1.12) |
| Vomiting | 1 | 0.25(0.04,1.78) | 0.25(2.24) | 0.25(0.04) | -1.99(-3.36) |
| Abdominal discomfort | 1 | 0.72(0.10,5.13) | 0.72(0.11) | 0.72(0.10) | -0.47(-2.30) |

Abbreviation: Asterisks (*) indicate statistically significant signals in algorithm; ROR, reporting odds ratio; PRR, proportional reporting ratio; EBGM, empirical Bayesian geometric mean; EBGM05, the lower limit of the 95% CI of EBGM; IC, information component; IC025, the lower limit of the 95% CI of the IC; CI, confidence interval; PT, preferred term; AE, adverse event.

**Supplementary Table 7:** Top 50 most frequent AEs for etrasimod at the PT level in patients aged ≥65 from FAERS data

| **PT** | **Case Numbers** | **ROR (95% CI)** | **PRR (χ2)** | **EBGM (EBGM05)** | **IC (IC025)** |
| --- | --- | --- | --- | --- | --- |
| Drug ineffective* | 9 | 3.12(1.60,6.09) | 3.03(12.45) | 3.03(1.56) | 1.60(0.40) |
| Diarrhoea | 6 | 2.19(0.97,4.94) | 2.16(3.79) | 2.16(0.96) | 1.11(-0.22) |
| Rash* | 5 | 3.62(1.49,8.79) | 3.56(9.26) | 3.56(1.47) | 1.83(0.12) |
| Rectal haemorrhage* | 4 | 15.58(5.79,41.91) | 15.31(53.55) | 15.31(5.69) | 3.94(0.68) |
| Colitis* | 4 | 27.59(10.26,74.22) | 27.10(100.57) | 27.09(10.07) | 4.76(0.82) |
| Nausea | 4 | 1.59(0.59,4.27) | 1.58(0.85) | 1.58(0.59) | 0.66(-0.81) |
| Drug hypersensitivity | 3 | 4.55(1.46,14.22) | 4.50(8.19) | 4.50(1.44) | 2.17(-0.20) |
| Haematochezia* | 3 | 13.14(4.20,41.07) | 12.97(33.17) | 12.97(4.15) | 3.70(0.24) |
| Gastrooesophageal reflux disease* | 3 | 11.29(3.61,35.29) | 11.15(27.74) | 11.15(3.57) | 3.48(0.20) |
| Colitis ulcerative* | 3 | 45.01(14.40,140.75) | 44.40(127.21) | 44.37(14.19) | 5.47(0.45) |
| Frequent bowel movements | 2 | 24.59(6.11,98.99) | 24.37(44.82) | 24.36(6.05) | 4.61(-0.21) |
| Abdominal pain | 2 | 2.80(0.69,11.25) | 2.78(2.28) | 2.78(0.69) | 1.47(-0.88) |
| Abdominal pain upper | 2 | 2.93(0.73,11.78) | 2.91(2.52) | 2.91(0.72) | 1.54(-0.85) |
| Hypertension | 2 | 2.30(0.57,9.27) | 2.29(1.46) | 2.29(0.57) | 1.20(-1.00) |
| Arthritis | 2 | 6.54(1.63,26.34) | 6.49(9.31) | 6.49(1.61) | 2.70(-0.48) |
| Proctitis ulcerative | 2 | 2874.23(690.25,11968.5) | 2847.51(5420.03) | 2711.96(651.28) | 11.41(-0.15) |
| Vertigo | 2 | 8.85(2.20,35.63) | 8.78(13.80) | 8.78(2.18) | 3.13(-0.39) |
| Large intestine perforation | 2 | 55.08(13.68,221.82) | 54.58(105.11) | 54.52(13.54) | 5.77(-0.15) |
| Dehydration | 2 | 2.71(0.67,10.91) | 2.69(2.14) | 2.69(0.67) | 1.43(-0.90) |
| Proctitis ulcerative | 2 | 2874.23(690.25,11968.5) | 2847.51(5420.03) | 2711.96(651.28) | 11.41(-0.15) |
| Large intestine polyp | 2 | 51.27(12.73,206.47) | 50.80(97.58) | 50.76(12.60) | 5.67(-0.15) |
| Thrombosis | 2 | 5.96(1.48,23.98) | 5.91(8.17) | 5.91(1.47) | 2.56(-0.51) |
| Injection site rash | 1 | 20.33(2.85,145.03) | 20.24(18.29) | 20.23(2.84) | 4.34(-1.12) |
| Dementia | 1 | 5.06(0.71,36.12) | 5.05(3.25) | 5.04(0.71) | 2.33(-1.31) |
| Abdominal pain lower | 1 | 16.87(2.36,120.34) | 16.79(14.85) | 16.79(2.35) | 4.07(-1.13) |
| Eructation | 1 | 13.12(1.84,93.58) | 13.06(11.14) | 13.06(1.83) | 3.71(-1.16) |
| Diarrhoea haemorrhagic | 1 | 30.84(4.32,220.06) | 30.70(28.72) | 30.68(4.30) | 4.94(-1.10) |
| Haemorrhage | 1 | 2.45(0.34,17.46) | 2.44(0.85) | 2.44(0.34) | 1.29(-1.55) |
| Visual acuity reduced transiently | 1 | 555.49(77.15,3999.40) | 552.91(545.62) | 547.61(76.06) | 9.10(-1.07) |
| Colectomy | 1 | 99.16(13.88,708.37) | 98.70(96.55) | 98.53(13.79) | 6.62(-1.07) |
| Defaecation urgency | 1 | 45.51(6.38,324.85) | 45.31(43.30) | 45.27(6.34) | 5.50(-1.08) |
| Metabolic dysfunction-associated steatohepatitis | 1 | 321.44(44.82,2305.04) | 319.94(316.18) | 318.16(44.37) | 8.31(-1.07) |
| Dyspepsia | 1 | 2.83(0.40,20.19) | 2.82(1.18) | 2.82(0.40) | 1.50(-1.49) |
| Faeces hard | 1 | 54.44(7.63,388.59) | 54.19(52.16) | 54.14(7.58) | 5.76(-1.08) |
| Arrhythmia | 1 | 4.34(0.61,30.97) | 4.33(2.56) | 4.33(0.61) | 2.11(-1.35) |
| Prostate cancer | 1 | 3.62(0.51,25.80) | 3.61(1.89) | 3.61(0.51) | 1.85(-1.40) |
| Liver disorder | 1 | 5.80(0.81,41.34) | 5.77(3.95) | 5.77(0.81) | 2.53(-1.28) |
| Pneumonia | 1 | 0.55(0.08,3.92) | 0.55(0.37) | 0.55(0.08) | -0.86(-2.55) |
| Lacrimation increased | 1 | 8.98(1.26,64.06) | 8.94(7.06) | 8.94(1.25) | 3.16(-1.20) |
| Osteoporosis | 1 | 8.12(1.14,57.92) | 8.09(6.21) | 8.09(1.13) | 3.02(-1.22) |
| Pulmonary embolism | 1 | 2.74(0.38,19.51) | 2.73(1.10) | 2.73(0.38) | 1.45(-1.50) |
| Oral fungal infection | 1 | 86.56(12.12,618.22) | 86.16(84.05) | 86.03(12.04) | 6.43(-1.07) |
| Hepatic cyst | 1 | 70.03(9.81,500.03) | 69.71(67.64) | 69.62(9.75) | 6.12(-1.07) |
| Eosinophilic oesophagitis | 1 | 1100.31(151.42,7995.49) | 1095.20(1072.57) | 1074.55(147.88) | 10.07(-1.09) |
| Glaucoma | 1 | 10.88(1.52,77.59) | 10.83(8.93) | 10.83(1.52) | 3.44(-1.18) |
| Drug ineffective for unapproved indication | 1 | 6.23(0.87,44.46) | 6.21(4.37) | 6.21(0.87) | 2.63(-1.27) |
| Retinal tear | 1 | 115.35(16.14,824.29) | 114.82(112.61) | 114.59(16.04) | 6.84(-1.07) |
| Presbyacusis | 1 | 417.63(58.14,2999.80) | 415.69(410.70) | 412.69(57.45) | 8.69(-1.07) |
| Large intestinal ulcer | 1 | 81.04(11.35,578.75) | 80.67(78.57) | 80.55(11.28) | 6.33(-1.07) |
| Peripheral swelling | 1 | 1.47(0.21,10.50) | 1.47(0.15) | 1.47(0.21) | 0.56(-1.80) |

Abbreviation: Asterisks (*) indicate statistically significant signals in algorithm; ROR, reporting odds ratio; PRR, proportional reporting ratio; EBGM, empirical Bayesian geometric mean; EBGM05, the lower limit of the 95% CI of EBGM; IC, information component; IC025, the lower limit of the 95% CI of the IC; CI, confidence interval; PT, preferred term; AE, adverse event.

**Supplementary Table 8:** Two-by-two contingency table for disproportionality analyses.

|  | Target AEs | Other AEs | Total |
| --- | --- | --- | --- |
| Target drug (Etrasimod) | a | b | a+b |
| Other drugs | c | d | c+d |
| Total | a+c | b+d | a+b+c+d |

Abbreviation: AEs, adverse events; a, number of reports containing both the target drug and target adverse drug reaction; b, number of reports containing other adverse drug reaction of the target drug; c, number of reports containing the target adverse drug reaction of other drugs; d, number of reports containing other drugs and other adverse drug reactions.

**Supplementary Table 9:** Four major algorithms used for signal detection.

| Algorithms | Equation | Criteria |
| --- | --- | --- |
| ROR | ROR=ad/b/c | lower limit of 95% CI>1, N≥3 |
| 95%CI=eln(ROR)±1.96(1/a+1/b+1/c+1/d)^0.5 |
| PRR | PRR=a(c+d)/c/(a+b) | PRR≥2, χ2≥4, N≥3 |
| χ2=[(ad-bc)^2](a+b+c+d)/[(a+b)(c+d)(a+c)(b+d)] |
| BCPNN | IC=log2a(a+b+c+d)(a+c)(a+b) | IC025>0 |
| 95%CI= E(IC) ± 2V(IC)^0.5 |
| MGPS | EBGM=a(a+b+c+d)/(a+c)/(a+b) | EBGM05>2 |
| 95%CI=eln(EBGM)±1.96(1/a+1/b+1/c+1/d)^0.5 |

Abbreviation: a, number of reports containing both the target drug and target adverse drug reaction; b, number of reports containing other adverse drug reaction of the target drug; c, number of reports containing the target adverse drug reaction of other drugs; d, number of reports containing other drugs and other adverse drug reactions. 95%CI, 95% confidence interval; N, the number of reports; χ2, chi-squared; IC, information component; IC025, the lower limit of 95% CI of the IC; E(IC), the IC expectations; V(IC), the variance of IC; EBGM, empirical Bayesian geometric mean; EBGM05, the lower limit of 95% CI of EBGM.
